# Supplementary material for: Fitting power-laws in empirical data with estimators that work for all exponents
Source: PubMed Central journal article supplement (PMC5330461; doi:10.1371/journal.pone.0170920), 2017-02-28
Supplement: pone.0170920.s003.pdf [file pone.0170920.s003.pdf]

---

## S3: Fitting power-laws in empirical data with estimators that work for all exponents

Rudolf Hanel<sup>1</sup>, Bernat Corominas-Murtra<sup>1</sup>, Bo Liu<sup>1</sup>, Stefan Thurner<sup>1,2,3,4</sup>,

**1** Section for Science of Complex Systems, Medical University of Vienna, Spitalgasse 23, 1090 Vienna, Austria

**2** Santa Fe Institute, 1399 Hyde Park Road, Santa Fe, NM 87501, USA

**3** IIASA, Schlossplatz 1, 2361 Laxenburg, Austria

**4** Complexity Science Hub Vienna, Josefstädterstrasse 39, A-1090 Vienna, Austria

✉Current Address: Section for Science of Complex Systems, CeMSIIS, Medical University of Vienna, Spitalgasse 23, Bauteil 86, A-1090, Vienna, Austria

\* stefan.thurner@meduniwien.ac.at

## APPENDIX C: The false rejection rate of power-laws

The KS goodness of fit (GOF) test is not actually testing whether the estimated data has been generated by a power-law or not. It estimates the false rejection rate of power-laws with respect to the estimated exponent. Since the exponent of a power-law is measured with a finite accuracy the KS GOF-test tells you whether the estimated exponent is acceptable rather than measuring whether the hypothesis that what we observe is a power-law or not. To control the false rejection rate of the power-law hypothesis, which is what a p-value is good for, one needs to know the p-values of the entire  $ML^*$  estimator.

Let  $KS$  be the same variable,

$$KS = \max_{i \in \text{range}} \{|F_{\text{data}}(i) - F_{\alpha}(i)|\}, \quad (1)$$

that is used in the statistics of the KS GOF-test, where  $F_{\text{data}}(i)$  is the cumulative distribution-function generated from the data (the cumulative of the normalized histogram), and  $F_{\alpha}(i)$  is the cumulative distribution function with regard to the estimated exponent  $\alpha$ . By sampling a large number of data-sets from exact power-laws and looking at the distribution of corresponding KS values, measuring the deviation between the power-law with estimated exponent and the data, one obtains the p-values of the  $ML^*$  estimator.

We provide an algorithm `r_plfit_calibrate`, and `r_plfit_calib_eval`, which can be used to determine the critical value  $KS_{\text{crit}}$  such that rejecting an  $ML^*$  estimate with  $KS \geq KS_{\text{crit}}$  and accepting estimates  $KS < KS_{\text{crit}}$  allows us to control the actual false rejection rate of the  $ML^*$  estimator. I.e. if we calibrate  $KS_{\text{crit}}$  for a expected exponent  $\alpha$ , a given sample size, and a given confidence level, e.g. the confidence level 0.05, then the resulting value  $KS_{\text{crit}}$  ensures that if we sample from an exact power-law with exponent  $\alpha$ , we will reject only 5% of all the sampled data. In contrast to what one may expect from the KS-GOF test  $KS_{\text{crit}}$  becomes rather large and many data sets that would be rejected by the KS-GOF test need in fact to be accepted!

The calibration algorithm,

`out1 = r_plfit_calibrate(alpha,W, Nsamples, Nrep)`, requires the variables `alpha`, the expected exponent, `W`, the number of states found in the sample, `Nsamples`,

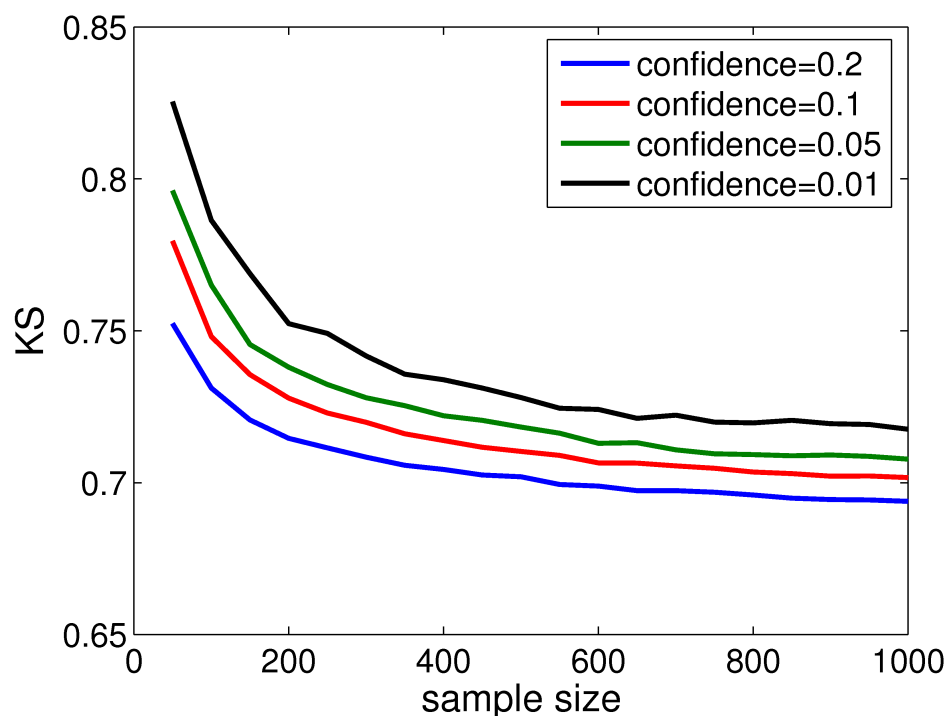

**Fig 1.** Calibration curves for an expected exponent  $\alpha = 1$  and  $W = 100$  states. Depending on the sample-size the critical KS values are shown for confidence levels 0.01, 0.05, 0.1 and 0.2. Curves have been computed using `out1 = r_plfit_calibrate( $\alpha, W, N_{\text{samples}}, 1000$ )`, with `Nsamples = 50 : 50 : 1000`, and a function to evaluate the calibration data, `out2 = r_plfit_calib_eval(out1, p, N, 1)`. The critical threshold values  $KS_{\text{crit}}$ , of the KS parameter for a sample size  $N = 500$  are given by 0.7245 (confidence  $p = 0.01$ ), 0.7163 ( $p = 0.05$ ), and 0.7090 ( $p = 0.1$ ), and 0.6994 ( $p = 0.2$ ).

the a vector of sample sizes, e.g. `Nsamples=(500:500:25000)`, and `Nrep`, the number of times we sample a sample of size `Nsamples` from an exact power-law distribution with exponent `alpha`. Typically `Nrep` of order 1000 suffices to get good estimates for the critical p-values of the  $ML^*$  estimator. After running `r_plfit_calibrate`, which may take some time, one can use

`out2 = r_plfit_calib_eval(out1, confidence, samplesize, plotflg)` to obtain  $KS_{\text{crit}}$  which is returned as `out2.KScrit` by `r_plfit_calib_eval` for the confidence level `confidence` and the sample-size `samplesize` within the range specified in `Nsamples`. The flag `plotflg` can be used for plotting calibration curves (`plotflg = 1` or `plotflg = 2`) or suppressing the plot (`plotflg = 0`).

Figure (1) shows examples of calibration curves for  $\alpha = 1$  and sample sizes in the range of  $N = 50$  to  $N = 1000$ . It becomes obvious that the negative rejection rate is critically controlled by large KS values ( $> 0.65$ ). The maximal possible value is  $KS = 1$ . This paints a very different picture than we might expect from the KS-GOF test, which rejects hypothesis at much smaller values of the KS statistics. This means that calibrating the false rejection rate of the power-law hypothesis is one thing. Whether the estimate of  $\alpha$  is good enough for the KS-GOF test to accept that the data has been sampled from a power-law with exactly the estimated exponent is a totally different question. We therefore can use the calibrated KS values to accept whether or not we

---

believe data to be sampled from a power-law and we may rely on the KS goodness of fit test whether or not to believe in the exponent we have estimated.
